# Supplementary material for: Characterization and Comparison of Ocular Surface Microbiome in Newborns
Source: MDPI journal article supplement (doi:10.3390/microorganisms10071390), 2022-07-10
Supplement: s1 [file s1]

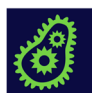

Supplementary Material

**Supplementary Table S1.** Characteristics of the cohort subjected to study.

| ID sample | Sex | Gestational age | Ethnicity | Vaginal swab | Ocular swab (dx and sx)    |
|-----------|-----|-----------------|-----------|--------------|----------------------------|
| 1A        | F   | 40 weeks        | Caucasian | negative     | T0: at birth               |
| 1B        |     |                 |           |              | T1: gentamicin prophylaxis |
| 2A        | F   | 44 weeks        | Caucasian | negative     | T0: at birth               |
| 2B        |     |                 |           |              | T1: gentamicin prophylaxis |
| 3A        | F   | 46 weeks        | Caucasian | negative     | T0: at birth               |
| 3B        |     |                 |           |              | T1: gentamicin prophylaxis |
| 4A        | F   | 46 weeks        | Caucasian | negative     | T0: at birth               |
| 4B        |     |                 |           |              | T1: gentamicin prophylaxis |
| 5A        | M   | 42 weeks        | Caucasian | negative     | T0: at birth               |
| 5B        |     |                 |           |              | T1: gentamicin prophylaxis |
| 6A        | M   | 42 weeks        | Caucasian | negative     | T0: at birth               |
| 6B        |     |                 |           |              | T1: gentamicin prophylaxis |
| 7A        | F   | 42 weeks        | Caucasian | negative     | T0: at birth               |
| /         |     |                 |           |              | T1: /                      |
| 8A        | F   | 43 weeks        | Caucasian | negative     | T0: at birth               |
| /         |     |                 |           |              | T1: /                      |
| 9A        | F   | 39 weeks        | Caucasian | negative     | T0: at birth               |
| /         |     |                 |           |              | T1: /                      |
| 10A       | M   | 41 weeks        | Caucasian | negative     | T0: at birth               |
| /         |     |                 |           |              | T1: /                      |
| 11A       | M   | 42 weeks        | Caucasian | negative     | T0: at birth               |
| /         |     |                 |           |              | T1: /                      |
| 12A       | M   | 40 weeks        | Caucasian | negative     | T0: at birth               |
| /         |     |                 |           |              | T1: /                      |
| 13A       | M   | 42 weeks        | Caucasian | negative     | T0: at birth               |
| /         |     |                 |           |              | T1: /                      |

**Supplementary Figure S1.** Read counts for each compound.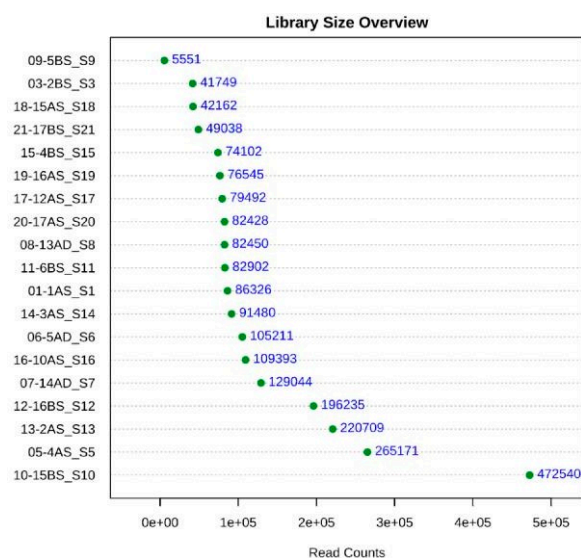**Supplementary Table S2.** Percentage values of assigned and unassigned reads at genus level.

| Name         | Reads assigned<br>(% value) | Reads unassigned (% value) |
|--------------|-----------------------------|----------------------------|
| 1-A          | 92.53                       | 7.48                       |
| 2-A          | 92.46                       | 7.55                       |
| 2-B          | 93.59                       | 6.43                       |
| 3-A          | 90.33                       | 9.64                       |
| 4-A          | 95.49                       | 4.53                       |
| 4-B          | 75.81                       | 24.11                      |
| 5-A          | 94.85                       | 5.16                       |
| 5-B          | 96.70                       | 3.32                       |
| 6-B          | 96.49                       | 3.51                       |
| 10-A         | 91.01                       | 9.00                       |
| 12-A         | 87.39                       | 12.60                      |
| 13-A         | 93.63                       | 6.38                       |
| 14-A         | 95.69                       | 4.31                       |
| 15-A         | 89.74                       | 10.29                      |
| 15-B         | 96.84                       | 3.15                       |
| 16-A         | 90.68                       | 9.27                       |
| 16-B         | 97.15                       | 2.83                       |
| 17-A         | 91.92                       | 8.06                       |
| 17-B         | 85.63                       | 14.36                      |
| Mean (%)     | 92.00                       | 8.00                       |
| Std.Dev. (%) | 5.09                        | 5.07                       |
